# Supplementary material for: Clinical Benefit of Long-Term Disease Control with Pomalidomide and Dexamethasone in Relapsed/Refractory Multiple Myeloma Patients
Source: MDPI journal article supplement (doi:10.3390/jcm8101695), 2019-10-16
Supplement: s1 [file s1]

**Supplementary Table S1.** Previous treatments in a cohort of 76 RRMM patients treated with PomaD.

|                                                       |             |
|-------------------------------------------------------|-------------|
| <b>Median of previous treatments (range)</b>          | 3 (1-8)     |
| <b>Median time between diagnosis and baseline</b>     | 65.9 months |
| <b>State of disease before pomalidomide treatment</b> |             |
| Refractory, N (%)                                     | 36 (47.3%)  |
| Relapse, N (%)                                        | 40 (52.6%)  |
| Double refractory, N (%)                              | 33 (43%)    |
| <b>Last therapy before pomalidomide treatment</b>     |             |
| IMiDs, N (%)                                          | 49 (64.4%)  |
| PIs, N (%)                                            | 21 (27.6%)  |
| Conventional chemotherapy, N (%)                      | 6 (8%)      |
| <b>Previous autologous transplantation</b>            | 28 (36.8%)  |
| <b>Previous allogenic transplantation</b>             | 8 (10.5%)   |
